1 Biological activity of *Ajuga iva* extracts against the African cotton leafworm

2 *Spodoptera littoralis*

---

3

4 Leena Taha-Salaime,<sup>1,2</sup> Galina Lebedev,<sup>3</sup> Jackline Abo-Nassar,<sup>2</sup> Sally Marzouk,<sup>2</sup> Moshe

5 Inbar,<sup>1</sup> Murad Ghanim,<sup>3</sup> and Radi Aly<sup>2\*</sup> 

6

7 <sup>1</sup> *Department of Evolutionary and Environmental Biology, The Faculty of Natural Science, University*  
8 *of Haifa, Haifa, Israel*

9 <sup>2</sup> *Department of Plant Pathology and Weeds Research, Newe Ya'ar Research Center, Agricultural*  
10 *Research Organization, Ramat Yishay, Israel*

11 <sup>3</sup> *Department of Entomology, Agricultural Research Organization, The Volcani Center, Rishon*  
12 *LeTsiyon 7528809, Israel*

13 \* *Correspondence to: Radi Aly, Department of Plant Pathology and Weeds Research, Newe Ya'ar*  
14 *Research Center, Agricultural Research Organization, Ramat Yishay 1021, Israel. E-mail:*  
15 *radi@volcani.agri.gov.il.*

16

17 Leena Taha-Salaime ORCID: <https://orcid.org/0000-0001-6717-613X>

18  <https://orcid.org/0000-0002-6038-9586>

19

## 20 **Key Message**

21 Insects cause severe damage to numerous crops and their control relies on pesticides.

22 Green control is becoming increasingly popular due to concerns about the negative

23 impacts of pesticides on the environment. Phytoecdysteroids are found in *Ajuga* plants

24 and affect a wide range of insects at very low concentrations. Here we demonstrate that

25 crude extract from *Ajuga iva* alters the development of *Spodoptera littoralis*.

26 Phytoecdysteroids may therefore be beneficial in IPM programs.

27

28

29

30 Abstract

31 The African cotton leafworm *Spodoptera littoralis*, a major crop pest worldwide, is  
32 controlled by chemical insecticides, leading to serious resistance problems. *Ajuga* plants  
33 contain phytoecdysteroids (analogs of arthropod steroid hormones that regulate  
34 metamorphoses) and clerodanes (diterpenoids exhibiting antifeedant activity). We  
35 analyzed phytoecdysteroids and clerodanes in leaf extracts of the Israeli *Ajuga iva* by LC-  
36 TOF-MS and TLC, and their efficiency at reducing *S. littoralis* fitness. Castor bean leaves  
37 were smeared with an aqueous suspension of dried methanolic crude extract of  
38 phytoecdysteroid and clerodanes from *A. iva* leaves (50, 100 and 250 µg/µl). First and  
39 third instars of *S. littoralis* larvae were fed with 1 treated leaf for 3 and 4 days, respectively.  
40 Mortality, larval weight gain, relative growth rate and survival were compared to feeding  
41 on control leaves. To evaluate and localize *A. iva* crude leaf extract activity in the insect  
42 gut, we used DAPI and phalloidin staining. Crude extract of *A. iva* leaves (50, 100 and 250  
43 µg/µl) significantly increased mortality of first instar *S. littoralis* larvae (36%, 70% and 87%,  
44 respectively) compared to controls (6%). Third instar larval weight gain decreased  
45 significantly (by 52%, 44% and 30%, respectively), as did relative growth rate (−0.05 g/g  
46 day, compared to the relevant controls). *S. littoralis* larvae were further affected at later  
47 stages, with few survivors. Insect-gut staining showed that 250 µg/µl crude leaf extract  
48 reduces gut size, with relocation of nuclei and abnormal actin-filament organization. Our  
49 results demonstrate the potential of *A. iva* extract for alternative, environmentally safe  
50 insect-pest control.

51

52 Keywords *Ajuga*; Clerodane; Pest control; Phytoecdysteroid; *Spodoptera littoralis*

53

54

55 Introduction

56

57 The African cotton leafworm *Spodoptera littoralis* is considered one of the most serious  
58 pests of cotton, maize, rice, alfalfa, potato, tomato, ornamentals and orchard trees  
59 (Martinez and van Emden 2001). It feeds year-round on the leaves of numerous old- and  
60 new-world plant species (Adel El-Sayed et al. 2011). Today, insect pests are mainly  
61 controlled by insecticides, which constitute a risk to human health and the environment  
62 (Horowitz et al. 2005). Many organic insecticides have been derived from plant sources,  
63 and some, such as alkaloids, terpenoids, phenols and steroids, exhibit very high toxicity  
64 against a variety of agricultural pests. In this study, we examined the potential use of  
65 phytoecdysteroids and clerodanes extracted from *Ajuga* (Lamiaceae) plants to control the  
66 African cotton leafworm.

67 Phytoecdysteroids are plant-produced steroids that are analogs of the steroid  
68 hormones that control molting and metamorphosis in arthropods (Dinan 2001).  
69 Phytoecdysteroids are present in 5–6% of plant species (Sandlund et al. 2018), generally  
70 at higher concentrations than those typically found in arthropods (Dinan 1995a). Most of  
71 them possess a cholest-7-en-6-one carbon skeleton (C27), and are synthesized from  
72 phytosterols in the cytosol through the mevalonic acid pathway (Dinan 2001). They can  
73 mimic insect 20-hydroxyecdysteroid, bind insect ecdysone receptors and elicit the same  
74 responses (Sadek 2003). Phytoecdysteroids may cause abnormal larval development,  
75 feeding deterrence and ultimately, death (Sadek 2003). Ecdysteroids are not toxic to  
76 mammals because their structure is quite different from mammalian steroids, and they  
77 are not expected to bind to vertebrate steroid receptors (Lafont and Dinan 2003).

78 Ecdysone, a natural molting hormone of insects derived from enzymatic  
79 modification of cholesterol by p450 enzymes (Dinan 1989), controls developmental  
80 events by changing the levels of other ecdysteroids (Lafont 1997). The ecdysone receptor  
81 is a nuclear receptor (a ligand-activated transcription factor) that binds to and is activated  
82 by ecdysteroids. In *Manduca sexta* larvae, 20-hydroxyecdysone is primarily produced in  
83 the prothoracic gland, gut and fat bodies (Grieneisen et al. 1991) from dietary cholesterol,

84 and acts through the ecdysone receptor (Thummel and Chory 2002). In addition, the  
85 ecdysone receptor controls development, and contributes to other processes (such as  
86 reproduction) (Riddiford et al. 2000), and to interactions between the cytoskeleton (the  
87 effector of cell movement and changes in cell shape) and changes in the distribution of  
88 actin staining and microfilaments (Otey et al. 1990).

89 Discovery of the same molecules (phytoecdysteroids) in several plant species  
90 suggests that they may be effective against insect herbivores by acting as antifeedants  
91 and/or disrupting the insects' endogenous endocrine levels (Blackford et al. 1996;  
92 Dinan 2001; Belles and Piulachs 2014). Low concentrations (2–25 ppm) of  
93 phytoecdysteroids deter some insects, while others are resistant to even very high  
94 concentrations (400–1000 ppm) (Blackford et al. 1996). Kubo (1997) reported that an  
95 extract of *Ajuga remota* containing 20-hydroxyecdysone and cyasterone, added to the  
96 diet of *Bombyx mori*, inhibited ecdysis, resulting in larval retention of the exuvial head  
97 capsule and the insect's death. Similarly, larvae of the greenhouse whitefly exhibited 100%  
98 mortality when fed on *Ajuga reptans* plants. High levels of the three major  
99 phytoecdysteroids, 20-hydroxyecdysone (ecdysterone), makisterone A and cyasterone,  
100 have been found in several plants, including *Ajuga* (Tomás et al. 1992; Wessner et al. 1992;  
101 Dinan 2001; Coll and Tandrón 2005; Castro et al. 2008, 2011; Grace et al. 2008; Sun et al.  
102 2012; Lva et al. 2014; Guibout et al. 2015; Taha-Salaime et al. 2019), quinoa and spinach  
103 (Dinan 1995b, 2001). An extract of 20-hydroxyecdysone and cyasterone from *A. iva*  
104 showed high activity against *Oligonychus perseae* (Kubo and Klocke 1983; Aly et al. 2011);  
105 a dose of 5 µg/ml of pure extracted *A. iva* ecdysterone significantly reduced fecundity,  
106 fertility and survival of this pest, while commercial 20-hydroxyecdysone at the same dose  
107 had lesser effects (Aly et al. 2011).

108 In addition to phytoecdysteroids, species of the genus *Ajuga* also contain the  
109 bioactive compounds clerodane diterpenes (include clerodanes) and iridoid glycosides  
110 (Camps and Coll 1993). Clerodanes (diterpenoids) are a large group of C<sub>20</sub> terpene  
111 compounds derived from geranylgeranyl diphosphate and biosynthesized through the  
112 deoxyxylulose phosphate pathway in the cytoplasm, mostly in the leaves and stems of  
113 the Lamiaceae and Asteraceae families (Hussain et al. 2012). Clerodin was originally

114 isolated from *Clerodendrum infortunatum* L. (Lamiaceae), and has potential as a natural  
115 pesticide due to its insect antifeedant and repellent activities (Pereira and Gurudutt 1990;  
116 Kubo et al. 1991; Coll and Tandrón 2005; Koul 2016; Li et al. 2016). Koul (2016) showed that  
117 the most active compounds, dihydroclerodin and clerodin hemiacetal, from *Caryopteris*  
118 *divaricata* exhibit 100% antifeedant activity at 50 ppm. These clerodanes were deadly to  
119 *Spodoptera litura* larvae.

120 We previously identified and quantified high contents of three phytoecdysteroids  
121 and two clerodanes in *A. iva* growing in Israel (Taha-Salaime et al. 2019). We hypothesized  
122 that crude extract of *A. iva* leaves that includes the three phytoecdysteroids (20-  
123 hydroxyecdysone, makisterone A and cyasterone), which specifically interfere by  
124 controlling molting, and are responsible for the metamorphosis and antifeedant activities  
125 in insects, might be a promising pest-control agent. We evaluated the efficiency of *A. iva*  
126 extracts (containing phytoecdysteroids and clerodanes) at reducing the damage caused  
127 by *S. littoralis* larvae by addressing the following questions: Does *A. iva* crude leaf extract  
128 affect *S. littoralis* larvae? Do phytoecdysteroids isolated from the crude leaf extract and  
129 commercial standards have different effects on the larvae? Do phytoecdysteroids have a  
130 direct effect on the larvae's gut?

131

## 132 Materials and Methods

133

### 134 Plants and insects

135

136 *A. iva* plants were collected in April 2014 from a wild population in the Negev, southern  
137 Israel, and then cultivated and acclimated in an open field at Newe Ya'ar Research Center.  
138 Young and mature leaves and stems of fresh plants were collected after blooming (July–  
139 November) and oven-dried at 55°C for 3–4 days, then homogenized to a fine powder  
140 prior to extraction. The first and third instars of *S. littoralis* larvae used for the bioassays  
141 were from Murad Ghanim's laboratory, Department of Entomology, Agricultural Research  
142 Organization (African cotton leafworm colony) reared on castor bean leaves.

143

144 Extraction and purification of phytoecdysteroids

145

146 *A. iva* crude extracts were prepared according to our recently published procedure (Taha-  
147 Salaime et al. 2019). Leaf and stem powder were pooled (24 g) and soaked in 240 ml of  
148 100% MeOH, sealed and homogenized with shaking (2500 rpm) for 1 h. The extract was  
149 then centrifuged (112 *g*) for 10 min, filtered and concentrated under vacuum. The final  
150 filtered methanol solution was analyzed by liquid chromatography-time of flight-mass  
151 spectrometry (LC-TOF-MS) and dried in a chemical vaporizer for 5 days. For purification  
152 of phytoecdysteroids from the crude extract, leaf and stem powder (100 g) was soaked in  
153 300 ml methanol and homogenized. The filtered extract was vacuum-concentrated and  
154 treated with H<sub>2</sub>O to give 30% aqueous methanol. This solution was extracted as previously  
155 described (Aly et al. 2011).

156

157 Identification phytoecdysteroids and clerodanes

158

159 LC-TOF-MS analysis was used to identify and confirm the presence of phytoecdysteroids  
160 and clerodanes in three concentrations of *A. iva* crude leaf extract (50, 100 and 250 µg/µl).  
161 We analyzed the profile of phytoecdysteroids and clerodanes in the *A. iva* crude leaf  
162 extract before each test for biological activity. Extracts of the plant material (1 µl) were  
163 injected into an Agilent 1290 Infinity Series liquid chromatograph coupled with an Agilent  
164 1290 Infinity DAD and Agilent 6224 Accurate Mass TOF mass spectrometer (Agilent  
165 Technologies, Santa Clara, CA, USA) (Dinan 1989). Thin-layer chromatography (TLC) was  
166 used to separate the components into well-defined spots. The crude leaf extract, the pure  
167 isolated compounds (20-hydroxyecdysone [ecdysterone], makisterone A and cyasterone)  
168 and a commercial ecdysterone sample were applied to silica gel GF-254 plates (0.25 mm;  
169 20 × 20 cm) as described in Aly et al. (2011).

170

171 Biological activity of *A. iva* crude leaf extract against *S. littoralis*

172

173 To assess effects on the larvae, mature castor bean leaves were smeared, using a paint  
174 brush, with aqueous *A. iva* crude leaf extract (24 g of dried pooled leaves and stems  
175 dissolved in 240 ml MeOH, 1:10) and Tween 20 (1.5 mg). The leaves were dried in a  
176 chemical hood for 2 h. Then 10 first instar *S. littoralis* larvae were placed on 1 treated  
177 castor bean leaf in a petri dish and allowed to feed for 3 days in a climate-controlled  
178 room at 25°C. Control leaves were similarly smeared with double-distilled water (ddH<sub>2</sub>O)  
179 and Tween 20. The larvae were exposed to three concentrations of crude leaf extract (50,  
180 100 and 250 µg/µl), one concentration per treatment. After preparing the *A. iva* crude leaf  
181 extract, the methanolic extract was dried in a chemical hood; 1.2 g dried extract powder  
182 was dissolved in 4.8 ml ddH<sub>2</sub>O and Tween 20 (0.5 mg/ml) for the 250 µg/µl concentration;  
183 0.83 ml of the high concentration (250 µg/µl) extract was dissolved in 3 ml ddH<sub>2</sub>O to  
184 obtain the 100 µg/µl concentration; and 0.67 ml of the 100 µg/µl solution was dissolved  
185 in 3 ml ddH<sub>2</sub>O to obtain the 50 µg/µl concentration. At the end of the experiment, larval  
186 mortality was compared to that of controls. Data in this experiment represent the results  
187 of 11 replicates (10 larvae/replicate). Differences are reported as percent mortality of first  
188 instar larvae after feeding on the three concentrations of *A. iva* crude leaf extract using a  
189 t-test and significance was determined by t-test.

190 For the third instars, 1 or 10 larvae were fed on 1 treated castor bean leaf for 4 or  
191 8 days in a climate-controlled room at 25°C (more freshly treated leaves were provided  
192 after 4 days of feeding to avoid feeding on decayed leaves). Four different treatments  
193 were tested, where larvae were fed on castor bean leaves treated with: (1) 250 µg/µl *A.*  
194 *iva* crude leaf extract for 4 days, with a freshly treated leaf for 4 more days; (2) the same  
195 treatment as (1) with 250 µg/µl of a fractionated mixture of three phytoecdysteroids from  
196 *A. iva* leaf extract; (3) *A. iva* crude leaf extract for 4 days, and then a control castor bean  
197 leaf treated with ddH<sub>2</sub>O for the next 4 days; (4) a control castor bean leaf for 4 days and  
198 then *A. iva* crude leaf extract for the next 4 days. In parallel, control leaves were smeared  
199 with ddH<sub>2</sub>O and Tween 20 for 8 days. We recorded the different reactions of *S. littoralis*  
200 larvae in all treatments after 4 days, and if some larvae can recover again if provided  
201 control castor bean leaf larvae (first were fed on treated leaf), or were adversely affected  
202 and dead when provided a treated castor bean leaf after 4 days (first were fed on control  
203 leaves. In another experiment, third instar larvae were exposed to three concentrations of

204 *A. iva* crude leaf extract (50, 100 and 250 µg/µl) for 4 days. At the end of the experiment,  
205 we recorded larval survival and relative growth rate (RGR) as  $(\ln W_2 - \ln W_1) / (t_2 - t_1)$ , where  
206  $W_1$  and  $W_2$  are weights at times  $t_1$  and  $t_2$  ( $n = 20$  replicates). In each treatment, pupation  
207 rate was evaluated for an additional 15 days. RGRs were compared using a mixed-model  
208 ANOVA (repeated measures ANOVA until day 4 and two-way ANOVA from day 4 to the  
209 end of the experiment). Survival rates were analyzed using a Friedman test, since the data  
210 for larval survival did not follow a normal distribution. Data for larval weight gain (LWG)  
211 are the result of 10 replicates (10 larvae in each replicate). Comparisons of LWG were  
212 assessed using a repeated measures ANOVA. Statistical significance was reported at  $p <$   
213 0.05. Error bars in all graphs represent the standard error of the mean (SEM), and  
214 significance is indicated in each experiment. All statistical analyses were performed with  
215 IBM SPSS software v.20 for Windows (IBM, Armonk, NY, USA).

216

217 The effect of *A. iva* crude leaf extract and purified phytoecdysteroid mixture on larval gut  
218 of *S. littoralis*

219

220 To examine the gut morphology of *S. littoralis* larvae, we used DAPI and phalloidin  
221 staining. Larvae fed on castor bean leaves treated with *A. iva* crude leaf extract and  
222 controls (leaves treated with water) were tested after 7 days of treatment. Guts were  
223 dissected in phosphate buffered saline (1X PBS), then fixed in 4% paraformaldehyde in 1X  
224 PBS for 30 min, washed in 0.1% Triton X-100 for 30 min, washed three times in PBS Tween-  
225 20 (PBST) (<https://www.usbio.net/protocols/phosphate-buffered-saline-tween-20>),  
226 incubated in 0.1% phalloidin in PBST for 30 min, washed three times with PBST and  
227 mounted whole in 0.1% DAPI in hybridization buffer (20 mM Tris-HCl, pH 8.0, 0.9 M NaCl,  
228 0.01% w/v sodium dodecyl sulfate, 30% v/v formamide). Changes in actin fibers and nuclei  
229 were visualized under a Leica confocal microscope (Leica SP8 and Olympus IX 81 confocal  
230 laser scanning microscope).

231

232 Results

233

234 Identification of natural phytoecdysteroids from *A. iva* using TLC analysis



235

236 *A. iva* crude leaf extract was subjected to flash chromatography on a silica gel (TLC),  
237 yielding three individual isolated compounds (20-hydroxyecdysone, makisterone A and  
238 cyasterone). The retention factor (Rf) values, i.e., the distance migrated over the total  
239 distance covered by the solvent, of the phytoecdysteroid spots were similar to those of  
240 the respective commercial ecdysteroids (Fig. 1).

241

242 The effect of *A. iva* crude leaf extract on first instar larval survival

243

244 First instar *S. littoralis* larvae showed a significant increase in mortality (25, 65, 85%) after  
245 feeding on the three concentrations of *A. iva* crude leaf extract (50, 100 and 250 µg/µl,  
246 respectively), compared to the control (treated with water, 5%) (Fig. 2a).

247

248 The effect of *A. iva* crude leaf extract on third instar larval survival and development

249

250 Third instar *S. littoralis* larvae fed on crude leaf extract (50, 100 and 250 µg/µl) showed  
251 reduced LWG ( $F_{3,104} = 20.334, 17.246$  and  $13.007$ , respectively,  $p < 0.001$ ; Fig. 2b) compared  
252 to the control.

253 All concentrations of crude leaf extract significantly decreased ( $p < 0.001$ ) larval  
254 RGR compared to the normally developing larvae on the control diet (Fig. 3a, arrow).  
255 Reduced RGR was recorded as early as 2 days into the experiment. With the highest  
256 concentration of crude leaf extract, RGR decreased by 0.05 and 0.20 g/g day on days 6  
257 and 8, respectively, compared to the control ( $F_{3,16, 18} = 12.641$ ,  $p < 0.001$ ; Fig. 3a). All  
258 concentrations of *A. iva* crude leaf extract significantly reduced third instar larval survival  
259 after 11 days ( $\chi^2_3 = 6.221$ ,  $p = 0.038$ ; Fig. 3b). Whereas all larvae survived on the control  
260 leaves, the effect of the crude extract was apparent after 3 days. In fact, none of the  
261 treated larvae survived more than 8 days for the highest concentration of crude leaf  
262 extract and 10 days for the other concentrations (Fig. 3b).

263 In addition, when *S. littoralis* larvae were first fed on control leaves for 4 days and  
264 then on leaves treated with *A. iva* crude leaf extract for an additional 4 days, their RGR  
265 was affected by feeding on the crude leaf extract after day 5 of the experiment ( $F_{3,16, 18}$

266 =7.310,  $p < 0.001$ ; Fig. 4a), and continued to decrease until the end of the experiment,  
267 with no surviving larvae ( $X^2_3 = 9.282$ ,  $p = 0.021$ ; Fig. 4b).

268 The same result was obtained when the order of the treatments was reversed (Fig.  
269 4c, d). When the larvae were first fed on leaves treated with *A. iva* crude extract for 4 days  
270 and then fed on control leaves (for an additional 4 days), a significant decrease in RGR  
271 was obtained on days 2–4 ( $F_{3,16, 18} = 4.595$ , 3.608 and 8.113,  $p = 0.034$ , 0.02 and 0.001 for  
272 50, 100 and 250  $\mu\text{g}/\mu\text{l}$  crude leaf extract, respectively; Fig. 4c). Moreover, castor bean  
273 leaves treated with 250  $\mu\text{g}/\mu\text{l}$  of the mixture of the three fractionated and purified  
274 phytoecdysteroids from the *A. iva* crude leaf extract significantly reduced RGR ( $F_{2,20, 18} =$   
275 6.172,  $p = 0.001$ ) compared to the control (Fig. 5a). Few larvae survived on the leaves  
276 treated with purified phytoecdysteroid fraction ( $X^2_3 = 11.305$ ,  $p = 0.04$ ) (Fig. 5b).

277 Overall, larvae fed on castor bean leaves treated with 250  $\mu\text{g}/\mu\text{l}$  *A. iva* crude leaf  
278 extract or 250  $\mu\text{g}/\mu\text{l}$  of the phytoecdysteroid mixture lost weight, stopped growing and  
279 ultimately died (Fig. 5a, larvae depicted above columns).

280

281 The effect of *A. iva* crude leaf extract and purified phytoecdysteroid mixture on larval gut  
282 of *S. littoralis*

283

284 Larval guts were stained with phalloidin, an actin-specific marker that binds to the  
285 interface between adjacent actin monomers in the F-actin polymer, and with DAPI, which  
286 stains the nuclei. Larvae feeding on 250  $\mu\text{g}/\mu\text{l}$  *A. iva* crude leaf extract for 8 days had  
287 smaller nuclei with an abnormal shape—the nuclei moved to the edges of the cell and  
288 were thinner than normal (Fig. 6d–f). Phalloidin staining showed normal actin-filament  
289 organization in the control treatment (Fig. 6a–c). In contrast, in guts dissected from larvae  
290 treated with 250  $\mu\text{g}/\mu\text{l}$  crude leaf extract or 250  $\mu\text{g}/\mu\text{l}$  of the three phytoecdysteroids (20-  
291 hydroxyecdysone, makisterone A and cyasterone) isolated from the leaf extract, the actin  
292 filaments were smaller and their amount reduced (Fig. 6d–i). The damage observed in  
293 these experiments continued until the insects died. Overall, larvae exposed to crude leaf  
294 extract or its phytoecdysteroid fraction had less actin fibers and smaller, abnormally  
295 shaped nuclei.

296

297 Pupation of *S. littoralis* larvae following biological activity treatments

298

299 Larvae fed 250 µg/µl of crude leaf extract or 250 µg/µl of its phytoecdysteroid fraction  
300 for 8 days were unable to complete their development and pupate after 15 days (Fig. 7).  
301 Figure 7b and c shows the incomplete pupae obtained; the dying larvae had short limbs,  
302 small heads, decreased weight and only stomach and chest pupated, considered non-  
303 pupation. None of them completed their development to adult moths.

304

305 Discussion and Conclusions

306

307 As predicted by Taha-Salaim et al. (2019), we found that Israeli *A. iva* crude leaf extract  
308 and its fractionated phytoecdysteroids (20-hydroxyecdysone, makisterone A and  
309 cyasterone) significantly reduce the development and survival of *S. littoralis* larvae. These  
310 effects were pronounced throughout all larval developmental stages, including pupation.  
311 It has been shown that phytoecdysteroids negatively affect lepidopteran pests (Schmelz  
312 et al. 2002), whereas other insect species tolerate them (Schmelz et al. 2002; Taha-Salaim  
313 et al. 2019). We found that *S. littoralis* first and third instar larvae fed on *A. iva* crude leaf  
314 extract (50, 100 and 250 µg/µl) for 3 and 11 days, respectively, had increased mortality,  
315 reduced LWG and decreased RGR compared to the control treatment. Similarly,  
316 phytoecdysteroids from *A. iva* have been found to reduce the fertility and fecundity of  
317 *Bemisia tabaci* and *Oligonychus perseae* (Aly et al. 2011).

318 Our results are in agreement with previous studies suggesting that insect  
319 herbivores cannot develop and survive when fed on phytoecdysteroid-treated leaves.  
320 Ecdysteroids inhibited feeding of *Pieris brassicae* and *Mamestra brassicae* larvae when  
321 given at 200 mg/kg fresh weight in sucrose solution (Ma 1972), and inhibited drinking in  
322 *Dysdercus koenigii*, *Dysdercus fulvoniger* and *Spilostethus pandurus* adults at a  
323 concentration of 100 mg/kg (Schoonhoven and Derksen-Koppers 1973). Jones and Firn  
324 (1978) reported that ecdysone and 20-hydroxyecdysone deter feeding in *Pieris brassica*  
325 when incorporated above 5 mg/kg diet. Exogenous application of ecdysteroids was  
326 shown to be lethal to *Plodia interpunctella* and *Bombyx mori* larvae; ingestion of these  
327 compounds was toxic to the midgut epithelial cells (Tanaka and Yukuhiro 1999; Rharrabe

328 et al. 2009; Wadsworth et al. 2014). In our study, *A. iva* crude leaf extract was most  
329 effective at the highest concentration applied, indicating a dose-dependent effect, in  
330 agreement with other studies (Tanaka and Takeda 1993). In contrast, *S. littoralis* was not  
331 deterred from feeding by 20-hydroxyecdysone at 50–70 mg/kg (Jones and Firn 1978).

332 In our study, LWG and RGR of *S. littoralis* larvae were affected by feeding  
333 on 250 µg/µl methanolic crude leaf extract dissolved in ddH<sub>2</sub>O, regardless of larval age,  
334 in agreement with recent research using a methanolic extract of *Ajuga*  
335 *remota* leaves containing cyasterone and ecdysterone, which disrupted the  
336 molting cycle in *Bombyx mori* and *Spodoptera frugiperda* (Kubo et al. 1981).  
337 Moreover, Slama et al. (1993) found that cyasterone and turkesterone are the most  
338 effective lepidopteran- and coleopteran-specific ecdysteroids, and ingesting the  
339 phytoecdysteroid 20-hydroxyecdysone caused death before and during *Bombyx mori*  
340 molting (Chou and Lu 1980).

341 In the current study, we did not fractionate clerodanes from *A. iva* crude leaf  
342 extract due to the difficulty involved in calibrating the protocol for fractionation, and to  
343 the high cost of commercial clerodane standards. Kubo (1993) conducted an artificial  
344 diet-feeding assay with the wheat aphid *Schizaphis graminum*, and showed that  
345 ajugasterone C (a clerodane) was 10-fold more potent as a feeding deterrent than  
346 20-hydroxyecdysone, and 30-fold more potent than cyasterone (Kubo 1993).

347 In our study, we only used a few commercial standards because they are very  
348 expensive and are not feasible as a control treatment. We could not use them at the same  
349 concentrations as the applied treatment. Therefore, we conducted an experiment with a  
350 mixture of three commercial standards (ecdysterone, makisterone A and cyasterone) at a  
351 maximum concentration of 100 ppm each, which is very low compared to the  
352 concentration in the (crude leaf extract and phytoecdysteroid fraction treatments  
353 (250,000 ppm). *S. littoralis* larvae were fed on castor bean leaf treated with 100 ppm of  
354 the mixture for 8 days. No significant effect of the mixture on *S. littoralis* larvae was seen.  
355 Tanaka (1995) reported altered epidermal sensitivity to 20-hydroxyecdysone at 300  
356 ppm ecdysone, higher than the standard concentration used in our study.

357 Based on the results, phytoecdysteroids may affect insects by interfering with their  
358 developmental stages, especially during metamorphosis (Chou and Lu 1980). In the

359 present study, we observed suppressed pupation of *S. littoralis* due to the reduction in  
360 LWG; the larvae did not reach the threshold weight for pupation and they died because  
361 they could not complete their life cycle. The histological observations of the gut showed  
362 that *S. littoralis* is very sensitive to *A. iva* crude leaf extract and the mixture of the three  
363 fractionated phytoecdysteroids (20-hydroxyecdysone, makisterone A and cyasterone).  
364 The larval gut cells showed histolysis with clear signs of apoptosis. The gut epithelium  
365 showed massive deterioration, there was destruction of the microvilli of the columnar  
366 cells, and formation of vacuoles. In smaller larvae, mortality occurred during molting  
367 between instars, whereas in bigger larvae, most mortality was at the prepupal stage. Our  
368 results of gut cell destruction support the notion that the effect on pupation could be a  
369 consequence of disruptions in hormonal balance effected by internal levels of ecdysone.  
370 External ecdysteroid detoxification is one of the main ways in which insects overcome the  
371 toxic effects of these compounds. The transition from one stage in ovarian development  
372 to another, such as from previtellogenesis to vitellogenesis and then chorionogenesis, is  
373 governed by the actions of several pathways that respond to different titers of 20-  
374 hydroxyecdysone (Swevers and Iatrou 2003).

375 Feeding on phytoecdysteroids such as ecdysterone, polypodine B and  
376 ponasterone A induces ecdysial failure associated with the appearance of larvae  
377 having two head capsules and developmental anomalies during metamorphosis in  
378 *Acrolepiopsis assectella* (Arnault and Slama 1986). Since the reduced growth rate (Figs. 3,  
379 4) suggests that larvae are adversely affected by ingestion of the crude leaf extract and  
380 of the mixture of three phytoecdysteroids from *A. iva*, we assume that the effect observed  
381 on LWG and RGR reflects another possible mode of action of phytoecdysteroids.  
382 Abnormal gut development can lead to reduced LWG, leading to mortality. In the present  
383 study, disruptions in *S. littoralis* gut morphology and disappearance of microfilament  
384 structures in actin (Fig. 6) could be a consequence of the phytoecdysteroid titers in *A. iva*  
385 crude leaf extract. Actin microfilaments in particular have been associated with the  
386 rounding and loss of adhesion that frequently occur with viral infection or  
387 transformation in response to secondary metabolites (Carley et al. 1981; Meyer et  
388 al. 1981), with the intracellular transport of viral structural proteins and viral  
389 particles (Bohn et al. 1986), with the budding process of many enveloped viruses

390 (Mortara and Koch 1989), and with the assembly of virions in the cytoplasm  
391 (Jackson and Bellett 1989) and in the nucleus (Wang and Goldberg 1976).

392 In conclusion, our data suggest that the phytoecdysteroids and clerodanes of *A.*  
393 *iva* may be useful for the management of economically important insect pests such as *S.*  
394 *littoralis*, while reducing the risks to human health and the environment.

395

396 Acknowledgments

397

398 This work was supported by the Israeli Ministry of Science and Technology (research grant  
399 no. 3-14496). We thank Dr. Rachel Davidovich-Rikanati and Alona Sheachter for their  
400 fruitful advice and comments.

401

402 References

- 403 Adel El-Sayed H, Hani Kasim A, Enrique Vargas O (2011) Effects of the *Spodoptera littoralis*  
404 granulovirus on the development and reproduction of cotton leafworm *S. littoralis*.  
405 Biol Contr 5:192–199
- 406 Aly R, Ravid U, Abu-Nassar J, Botnick I, Lebedev J, Gal S, Ziadna H, Achdari G, Smirov E,  
407 Meir A, Ghanim M (2011) Biological activity of natural phytoecdysteroids from *Ajuga*  
408 *iva* against the sweet potato whitefly *Bemisia tabaci* and the perseas mite  
409 *Oligonychus perseae*. Pest Manag Sci 67(12):1493–1498
- 410 Arnault C, Slama K (1986) Dietary effects of phytoecdysones in the leek-moth,  
411 *Acrolepiopsis assectella* Zell. (Lepidoptera: Acrolepiidae). J Chem Ecol 12:1979–1986
- 412 Belles X, Piulachs MD (2014) Ecdysone signaling and ovarian development in insects: from  
413 stem cells to ovarian follicle formation. Biochim Biophys Acta 1849(2):181–186
- 414 Blackford M, Clarke B, Dinan L (1996) Tolerance of the Egyptian cotton leafworm  
415 *Spodoptera littoralis* (Lepidoptera: Noctuidae) to ingested phytoecdysteroids. J  
416 Insect Physiol 42:931–936
- 417 Bohn W, Rutter G, Hohenberg H, Mannweiler K, Nobis P (1986) Involvement of actin  
418 microfilaments in budding of measles virus: studies on cytoskeletons of  
419 infected cells. Virology 149:91–106
- 420 Camps F, Coll J (1993) Insect allelochemicals from *Ajuga* plants. Phytochemistry 32:1361–  
421 1370
- 422 Carley WW, Barak LS, Webb WW (1981) F-actin aggregates in transformed cells. J  
423 Cell Biol 90:797–802
- 424 Castro A, Coll J, Arfan M (2011) Neo-clerodane diterpenoids from *Ajuga bracteosa*. J Nat  
425 Prod 74:1036–1041
- 426 Castro A, Coll J, Tandrón YA, Pant AK, Mathela CS (2008) Phytoecdysteroids from *Ajuga*  
427 *macrosperma* var. *breWiflora* roots. J Nat Prod 71:1294–1296
- 428 Chou WS, Lu HS (1980) Growth regulation and silk production in *Bombyx mori* L. from  
429 phytogenous ecdysterone. In: Hoffman JA (ed) Progress in ecdysone research.  
430 Elsevier, North Holland, pp 281–297

- 431 Coll J, Tandrón Y (2005) Isolation and identification of neo-clerodane diterpenes from  
432 *Ajuga remota* by high-performance liquid chromatography. *Phytochem Anal* 16:61–  
433 67
- 434 Dinan L (1989) Ecdysteroid structure and hormonal activity. In: Koolman J (ed) *Ecdysone:*  
435 *from chemistry to mode of action*. George Thieme Verlag, Stuttgart, Germany, pp  
436 345–354
- 437 Dinan L (1995a) A strategy for the identification of ecdysteroid receptor agonists and  
438 antagonists from plants. *Eur J Entomol* 92:271–283
- 439 Dinan L (1995b) Distribution and levels of phytoecdysteroids within individual plants of  
440 species of the Chenopodiaceae. *Eur J Entomol* 92:295–300
- 441 Dinan L (2001) Phytoecdysteroids: biological aspects. *Phytochemistry* 57:325–339
- 442 Grace MH, Cheng DM, Raskin L, Lilaa MA (2008) Neo-clerodane diterpenes from *Ajuga*  
443 *turkestanica*. *Phytochem Lett* 1:81–84
- 444 Grieneisen ML, Warren JT, Sakurai S, Gilbert LI (1991) A putative route to ecdysteroids:  
445 metabolism of cholesterol in vitro by mildly disrupted prothoracic glands of  
446 *Manduca sexta*. *Insect Biochem* 21:41–51
- 447 Guibout I, Mamadalieva N, Balducci C, Giraultd JP, Lafonta R (2015) The minor  
448 ecdysteroids from *Ajuga turkestanica*. *Phytochem Anal* 26:293–300
- 449 Horowitz AR, Kontsedalov S, Khasdan V, Ishaaya I (2005) Biotypes B and Q of *Bemisia*  
450 *tabaci* and their relevance to neonicotinoid and pyriproxyfen resistance. *Arch Insect*  
451 *Biochem Physiol* 58:216–225
- 452 Hussain J, Begum N, Hussain H, Khan FU, Rehman NU, Al-Harrasi A, Ali L (2012)  
453 Ajuganane: a new phenolic compound from *Ajuga bracteosa*. *Nat Prod Commun*  
454 7:615–616
- 455 Jackson P, Bellett AJD (1989) Relationship between organization of the actin  
456 cytoskeleton and the cell cycle in normal and adenovirus-infected rat cells. *J*  
457 *Virology* 63:311–318
- 458 Jones CG, Firn RD (1978) The role of phytoecdysteroids in bracken fern, *Pteridium*  
459 *aquilinum* (L.) Kuhn as a defense against phytophagous insect attack. *J Chem Ecol*  
460 4:117–138
- 461 Koul O (2016) Insect feeding deterrents in plants. *Indian Rev Life Sci* 2:97–125



- 462 Kubo B (1993) Insect control agents from tropical plants. In: Downum KR, Romeo JT,  
463 Stafford HA (eds) Phytochemical potential of tropical plants. Plenum Press, New  
464 York, pp 133–151
- 465 Kubo I (1997) Tyrosinase inhibitors from plants. In: Hedin P, Hollingsworth R, Masler E,  
466 Miyamoto J, Thompson D (eds) Phytochemicals for pest control, volume 685. pp  
467 311–326. <https://doi.org/10.1021/bk-1997-0658.ch024>
- 468 Kubo I, Asaka Y, Shibata K (1991) Insect growth inhibitory nor-diterpenes, cis-  
469 dehydrocrotonin and trans-dehydrocrotonin, from *Croton cajucara*.  
470 *Phytochemistry* 30(8):2545–2546
- 471 Kubo I, Klocke JA (1983) Isolation of phytoecdysone as insect ecdysis inhibitors and  
472 feeding deterrent. In: Hedin PA (ed) Plant resistance to insects, chapter 19. American  
473 Chemical Society, Washington, DC, pp 329–346
- 474 Kubo I, Klocke JA, Asano S (1981) Insect ecdysis inhibitors from the East African medicinal  
475 plant *Ajuga remota* (Labiateae). *Agric Biol Chem* 45:1925–1927
- 476 Lafont R (1997) Ecdysteroids and related molecules in animals and plants. *Arch Insect*  
477 *Biochem Physiol* 35:3–20
- 478 Lafont R, Dinan L (2003) Practical uses for ecdysteroids in mammals including humans:  
479 and update. *J Insect Sci* 3:7. <https://doi.org/10.1093/jis/3.1.7>
- 480 Li R, Morris-Natschke SL, Lee KH (2016) Clerodane diterpenes: sources, structures, and  
481 biological activities. *Nat Prod Rep* 33:1166–1226
- 482 Lva H, Luo J, Konga L (2014) A new neo-clerodane diterpene from *Ajuga decumbens*.  
483 *Nat Prod Res* 28:196–200
- 484 Ma WC (1972) Dynamics of feeding responses in *Pieris brassicae* L. as a function of  
485 chemosensory input: a behavioural, ultrastructural and electrophysiological study.  
486 Dissertation, Landbouwhogeschool Wageningen
- 487 Martinez SS, van Emden HF (2001) Growth disruption, abnormalities and mortality of  
488 *Spodoptera littoralis* (Boisduval) (Lepidoptera: Noctuidae) caused by Azadirachtin.  
489 *Neotrop Entomol* 30:113–125
- 490 Meyer RK, Burger MM, Tschannen R, Schafer R (1981) Actin filament bundles in  
491 vaccinia virus infected fibroblasts. *Arch Virol* 67:11–18

- 492 Mortara RA, Koch GLE (1989) An association between actin and nucleocapsid  
493 polypeptides in isolated murine retroviral particles. *J Submicrosc Cytol Pathol*  
494 21:295–306
- 495 Otey CA, Pavalko FM, Burrige K (1990) An interaction between  $\alpha$ -actinin and the  $\beta$ 1  
496 integrin subunit in vitro. *J Cell Biol* 111:721–729
- 497 Pereira J, Gurudutt KN (1990) Growth inhibition of *Musca domestica* L. and *Culex*  
498 *quinquefasciatus* (say) by (-)-3-epicaryoptin isolated from leaves of *Clerodendron*  
499 *inerme* (Gaertn) (Verbenaceae). *J Chem Ecol* 16(7):2297–2306
- 500 Rharrabe K, Bouayad N, Sayah F (2009) Effects of ingested 20-hydroxyecdysone on  
501 development and midgut epithelial cells of *Plodia interpunctella* (Lepidoptera,  
502 Pyralidae). *Pestic Biochem Physiol* 93:112–119
- 503 Riddiford LM, Cherbas P, Truman JW (2000) Ecdysone receptors and their biological  
504 actions. *Vitam Horm* 60:1–73
- 505 Sadek MM (2003) Antifeedant and toxic activity of *Adhatoda vasica* leaf extract  
506 against *Spodoptera littoralis* (Lep., Noctuidae). *J Appl Entomol* 127:396–404
- 507 Sandlund L, Kongshaug H, Horsberg TE, Male R, Nilsen F, Dalvin S (2018) Identification  
508 and characterisation of the ecdysone biosynthetic genes *neverland*, *disembodied*  
509 and *shade* in the salmon louse *Lepeophtheirus salmonis* (Copepoda, Caligidae).  
510 *PLoS One*. <https://doi.org/10.1371/journal.pone.0191995>
- 511 Schmelz EA, Grebenok RJ, Ohnmeiss TE, Bowers WS (2002) Interactions between *Spinacia*  
512 *oleracea* and *Bradysia impatiens*: a role for phytoecdysteroids. *Arch Insect Biochem*  
513 51:204–221
- 514 Schoonhoven LM, Derksen-Koppers I (1973) Effects of secondary plant substances on  
515 drinking behaviour in some Heteroptera. *Entomol Exp Appl* 16:141–145
- 516 Slama K, Abubakirov NK, Gorovits MB, Baltaev UA, Saatov Z (1993) Hormonal  
517 activity of ecdysteroids from certain Asiatic plants. *Insect Biochem Mol*  
518 *Biol.*23:181–185
- 519 Sun Z, Li Y, Jin DQ, Guo P, Xu J, Guo Y, Zhang L (2012) Structure elucidation and inhibitory  
520 effects on NO production of clerodane diterpenes from *Ajuga decumbens*. *Planta*  
521 *Med* 78:1579–1583

- 522 Swevers L, Iatrou K (2003) The ecdysone regulatory cascade and ovarian development in  
523 lepidopteran insects: insights from the silk moth paradigm. *Insect Biochem Mol Biol*  
524 33:1285–1297
- 525 Taha-Salaime L, Davidovich-Rikanati R, Sadeh A, Abu-Nassar J, Marzouk-Kheredin S,  
526 Yahyaa Y, Ibdah M, Ghanim M, Lewinsohn E, Inbar M, Aly R (2019) Phytoecdysteroid  
527 and clerodane content in three wild *Ajuga* species in Israel. *ACS Omega* 4:2369–  
528 2376
- 529 Tanaka Y (1995) The different effects of ecdysone and 20-hydroxyecdysone on the  
530 induction of larval ecdysis in the silkworm, *Bombyx mori* (Lepidoptera: Bombycidae).  
531 *Eur J Entomol* 92:155–160
- 532 Tanaka Y, Takeda S (1993) Ecdysone and 20-hydroxyecdysone supplements to the diet  
533 affect larval development in the silkworm, *Bombyx mori*, differently. *J Insect Physiol*  
534 39:805–809
- 535 Tanaka Y, Yukuhiro F (1999) Ecdysone has an effect on the regeneration of midgut  
536 epithelial cells that is distinct from 20-hydroxyecdysone in the silk worm  
537 *Bombyxmori*. *Gen Comp Endocrinol* 116: 382–395
- 538 Thummel CS, Chory J (2002) Steroid signaling in plants and insects – common themes,  
539 different pathways. *Genes Dev* 16:3113–3129
- 540 Tomás J, Camps F, Claveria E, Coll J, Melé E, Messeguer J (1992) Composition and location  
541 of phytoecdysteroids in *Ajuga reptans* in vivo and in vitro cultures. *Phytochemistry*  
542 3:1585–1591
- 543 Wadsworth T, Carriman A, Gutierrez AA, Moffatt C, Fuse M (2014) Ecdysis behaviors and  
544 circadian rhythm of ecdysis in the stick insect, *Carausius morosus*. *J Insect Physiol*  
545 71:68–77
- 546 Wang E, Goldberg AR (1976) Changes in microfilament organization and surface  
547 topography upon transformation of chick embryo fibroblasts with Rous  
548 sarcoma virus. *Proc Natl Acad Sci USA* 73:4065–4069
- 549 Wessner M, Champion B, Girault JP, Kaouadji N, Saidi B, Lafont R (1992) Ecdysteroids from  
550 *Ajuga iva*. *Phytochemistry* 31:3785–3788

551

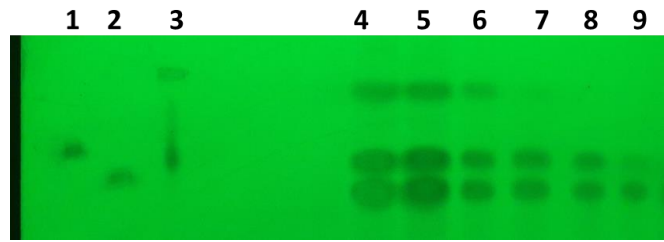

552  
553

554 Fig. 1 Identification of *A. iba* phytoecdysteroids by TLC. TLC plate shows the separation of  
555 three phytoecdysteroids (20-hydroxyecdysone, makisterone A and cyasterone) (4–6),  
556 commercial ecdysterone standards (1–3): makisterone (1), 20-hydroxyecdysone (2) and  
557 cyasterone (3). Fractions (7–9) show the presence of only 20-hydroxyecdysone and  
558 cyasterone. Fractions 4–6 were used in the bioassays

559

560

561

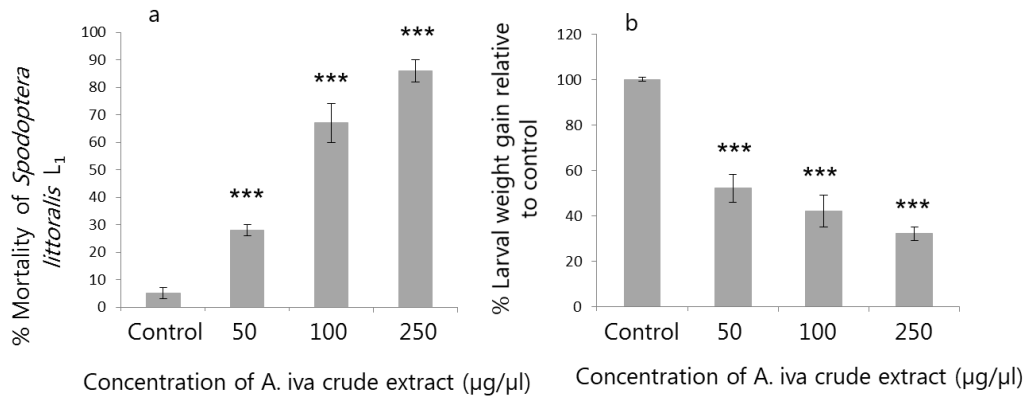

562

563 Fig. 2 Effect of different concentrations of *A. iva* crude leaf extract on *S. littoralis* first instar

564 (L<sub>1</sub>) larval (n = 110) mortality (mean  $\pm$  SEM) (a), and larval weight gain (%) (mean  $\pm$  SEM)

565 of *S. littoralis* third instar (L<sub>3</sub>) larvae (b). Asterisks above columns indicate significant

566 difference ( $p \leq 0.05$ ) by t- test ( $t_{108} = 6.105, 4.308$  and  $3.220$  for 50, 100 and 250  $\mu\text{g}/\mu\text{l}$ ,

567 respectively);  $p < 0.001$  for all treatments, Levene's test  $p = 0.326$  (a), and by repeated

568 measures ANOVA ( $F_{3,104} = 20.334, 17.246$  and  $13.007$  for 50, 100 and 250  $\mu\text{g}/\mu\text{l}$ ,

569 respectively);  $p < 0.001$ , Mauchly's test  $p = 0.152$  (b) between treatments and the control

570

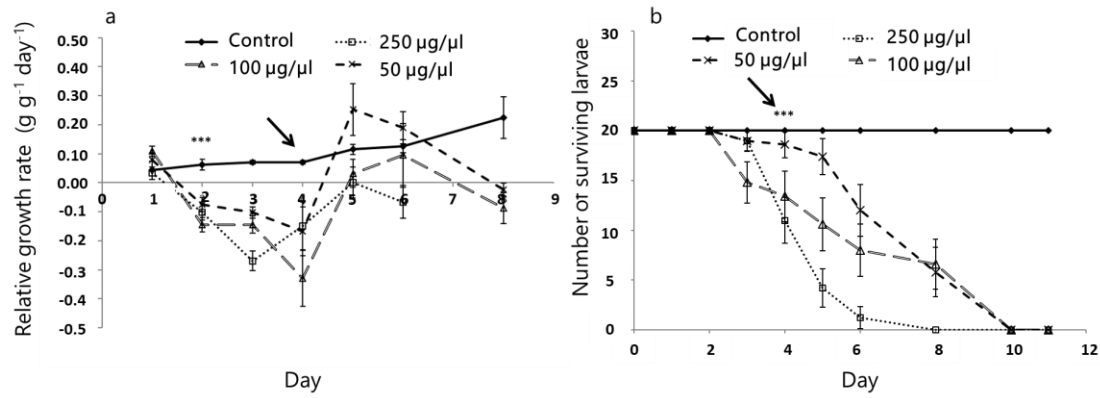

571

572

573 Fig. 3 Effect of different concentrations of *A. iva* crude leaf extract on *S. littoralis* third

574 instar larval relative growth rate (mean ± SEM) (a) and survival (b); n = 20. Asterisks above

575 points indicate significant difference ( $p \leq 0.05$ ) between treatments and the control

576

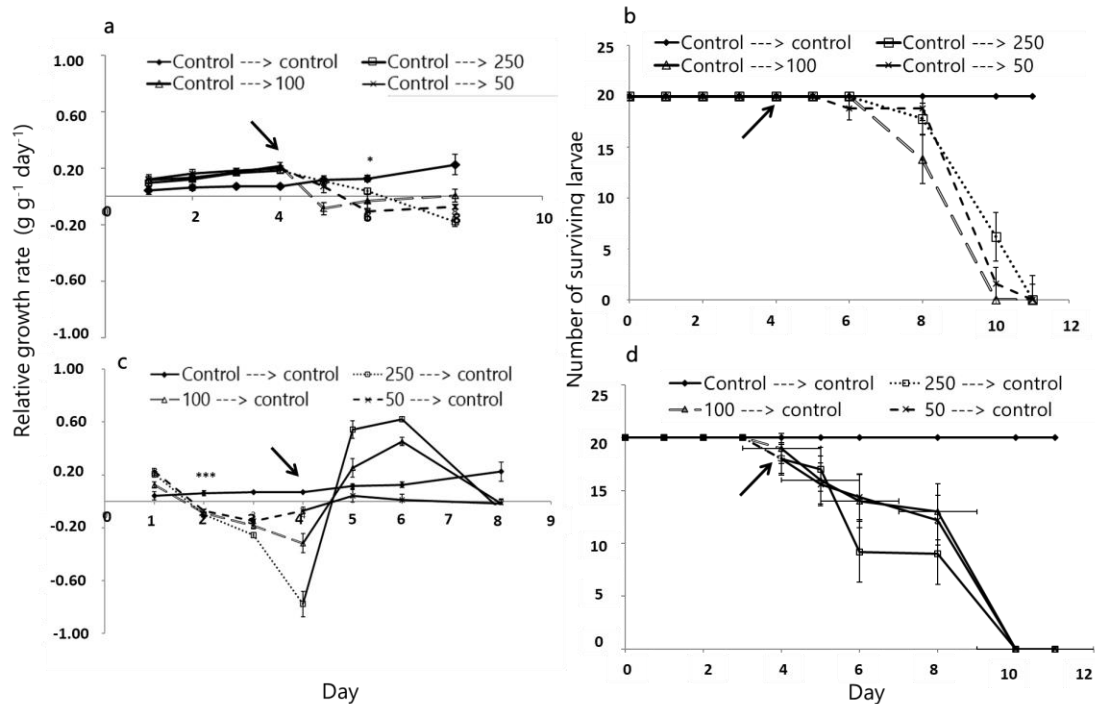

577

578

579

Fig. 4 Effect of *A. iva* crude leaf extract on *S. littoralis* third instar larval relative growth rate (mean  $\pm$  SEM) and survival. Larval relative growth rate (a) and survival (b) when fed on control leaf (treated with water) until day 4, and then fed on leaves treated with crude leaf extract at three concentrations until the end of the experiment (a). Relative growth rate (c) and survival (d) of the larvae after feeding on crude leaf extract at three concentrations until day 4 and then control leaves until the end of the experiment; n = 20. Asterisks above points indicate significant difference ( $p \leq 0.05$ ) between treatments and the control. Arrow points to day 4

587

588

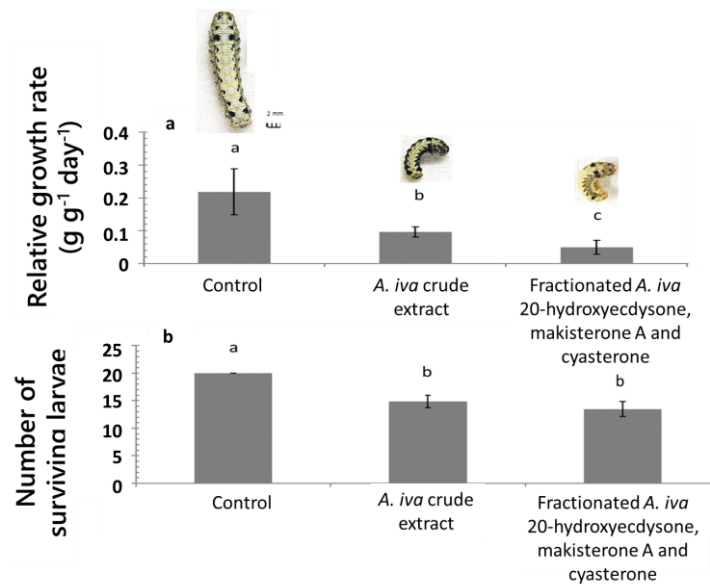

589

590

591 Fig. 5 Effect of *A. iva* crude leaf extract (250 µg/µl), and of the three fractionated and  
592 purified phytoecdysteroids (250 µg/µl) on *S. littoralis* third instar larval relative growth  
593 rate (mean ± SEM) (a) and survival (b). The phytoecdysteroid fraction contained 20-  
594 hydroxyecdysone, makisterone A and cyasterone; n = 20. Development of *S. littoralis*  
595 larvae shown above the columns after 4 days feeding on control leaves, or leaves treated  
596 with 250 µg/µl *A. iva* crude leaf extract or 250 µg/µl of the three fractionated  
597 phytoecdysteroids. Different letters above columns indicate significant difference (p ≤  
598 0.05) between treatments and the control

599

600

601

602



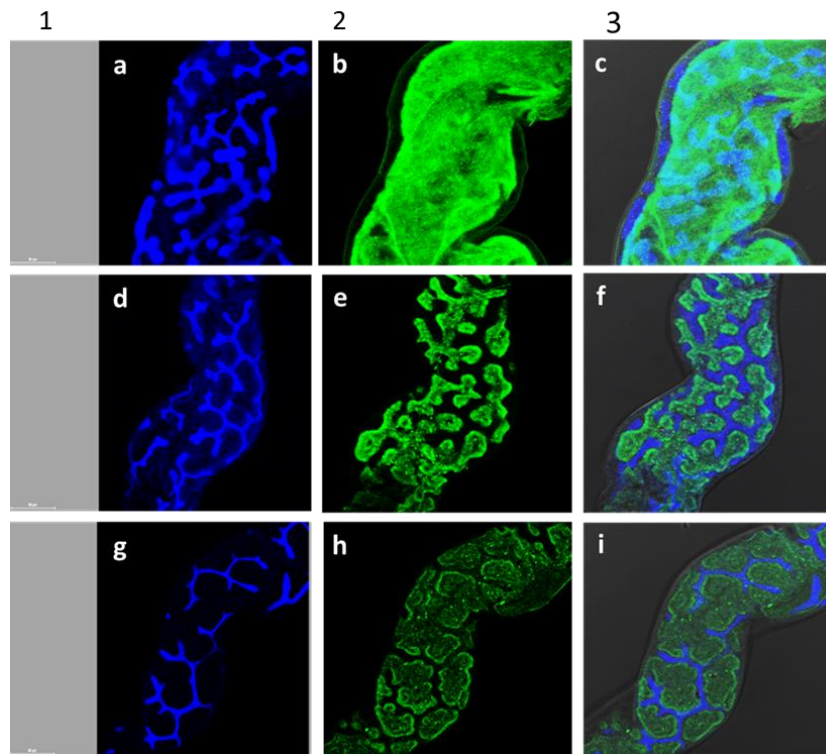

603

604 Fig. 6 Gut morphology of *S. littoralis* third instar larvae after feeding on treated or non-  
605 treated leaves: control castor bean leaves treated with water (a–c), leaves treated with *A.*  
606 *iva* crude leaf extract (250 µg/µl) (d–f), and leaves treated with 250 µg/µl of three  
607 fractionated and purified phytoecdysteroids from *A. iva* leaf extract (20-hydroxyecdysone,  
608 makisterone A and cyasterone) (g–i) for 8 days (60 µm, respectively). Blue: DAPI staining  
609 of the nuclei under dark field (1); green: phalloidin staining of actin filaments under dark  
610 field (2), and double DAPI staining of the nuclei and phalloidin staining of actin filaments  
611 under dark field (3)

612

613

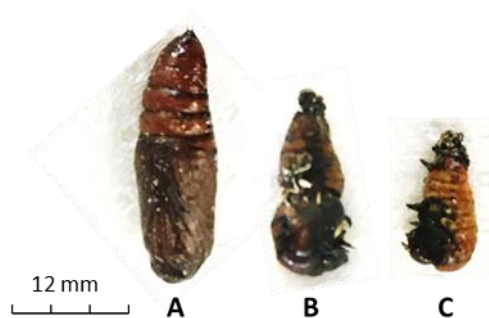

614

615 Fig. 7 Metamorphosis of control and treated *S. littoralis* larvae. Pupation of *S. littoralis*  
616 larvae after 15 days of exposure (feeding for 4 days) on *A. iva* crude leaf extract. Control  
617 (treated with water) (a), 250 µg/µl *A. iva* crude leaf extract (b) and 250 µg/µl of three  
618 fractionated and purified phytoecdysteroids from *A. iva* leaf extract fractions (20-  
619 hydroxyecdysone, makisterone A and cyasterone) (c). Deficient development of pupation  
620 in (b) and (c) is due to lower levels of the ecdysteroids responsible for molting  
621  
622

1992

1993

1994

1995

1996

1997

1998

1999

2000

2001

2002

2003

2004

2005

2006

2007

2008

2009

2010

2011

2012

2013

2014

2015

**a**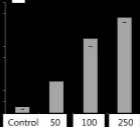**% Larval weight gain relative to control****b**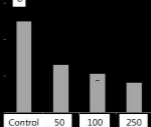Concentration of *A. iva* crude extract ( $\mu\text{g}/\mu\text{l}$ )Concentration of *A. iva* crude extract ( $\mu\text{g}/\mu\text{l}$ )

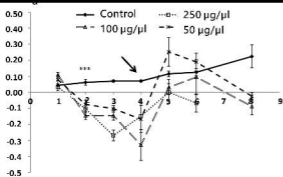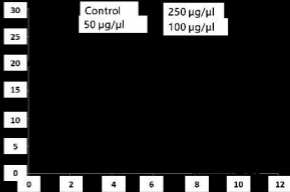

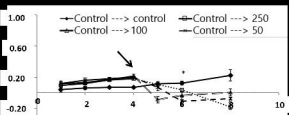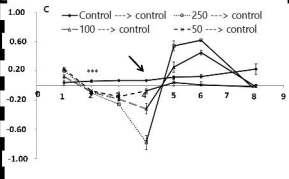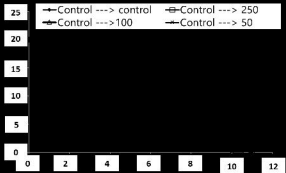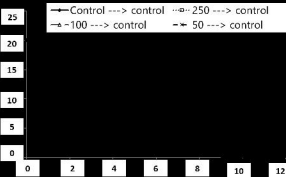

Relative growth rate  
(g g<sup>-1</sup> day<sup>-1</sup>)

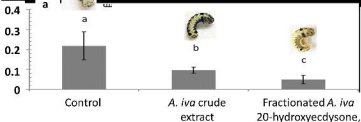

Number of  
surviving larvae

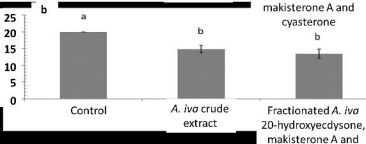

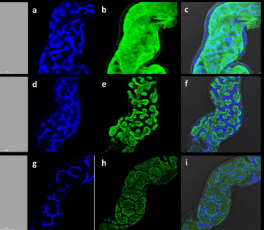



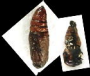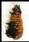

Source: https://www.biorxiv.org/content/biorxiv/early/2020/03/13/2020.03.12.988428.full.pdf
